# Supplementary material for: In vitro differentiation of single donor derived human dental mesenchymal stem cells into pancreatic β cell-like cells
Source: PubMed Central journal article supplement (PMC6527933; doi:10.1042/bsr20182051), 2019-05-21

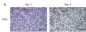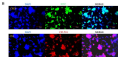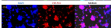

Supplement: bsr20182051_Supp1.pdf [file bsr20182051_Supp1.pdf]
